# Supplementary material
Source: PubMed Central journal article supplement (PMC3445432)

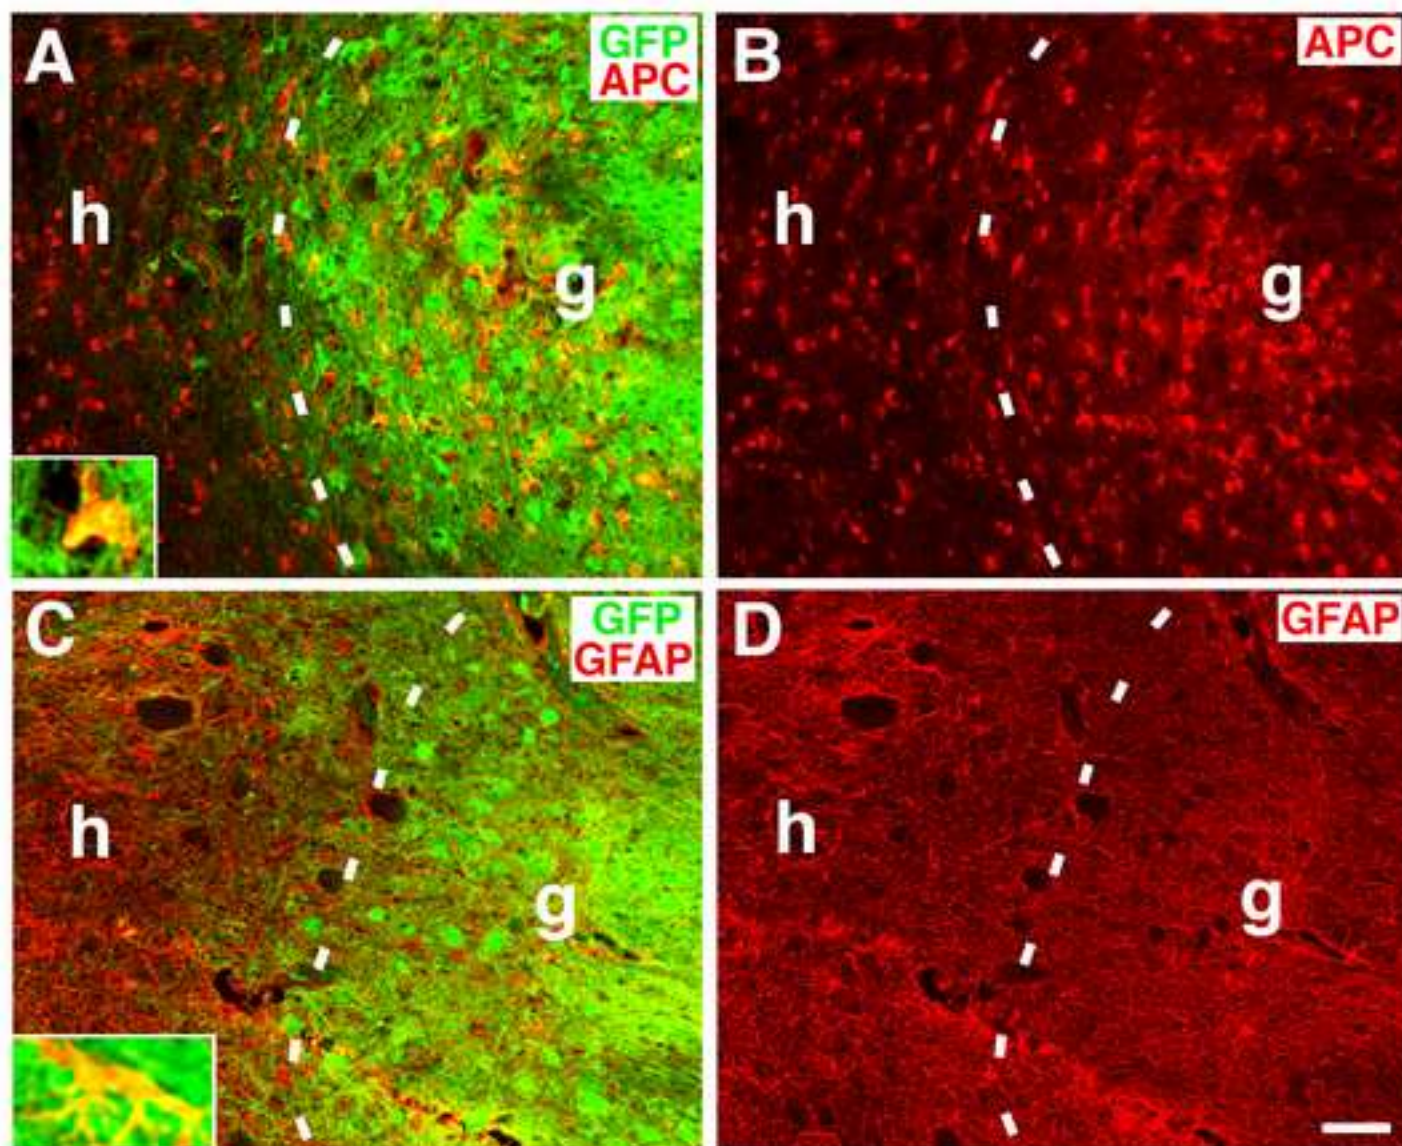

### E Neural cell type quantification

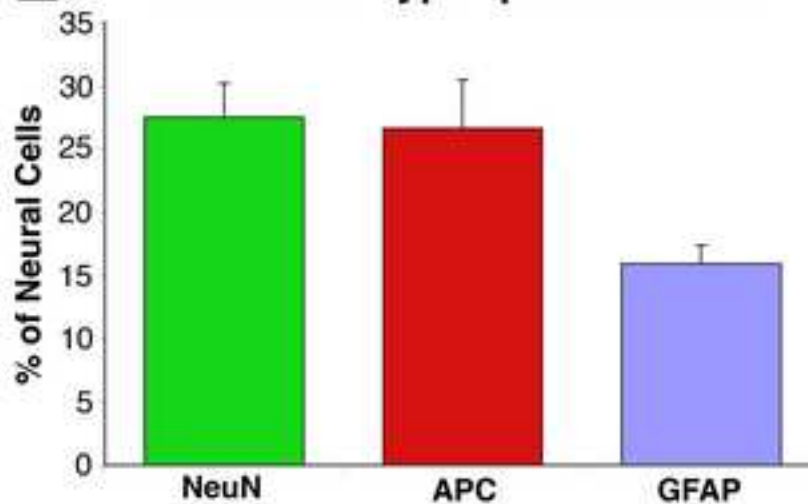

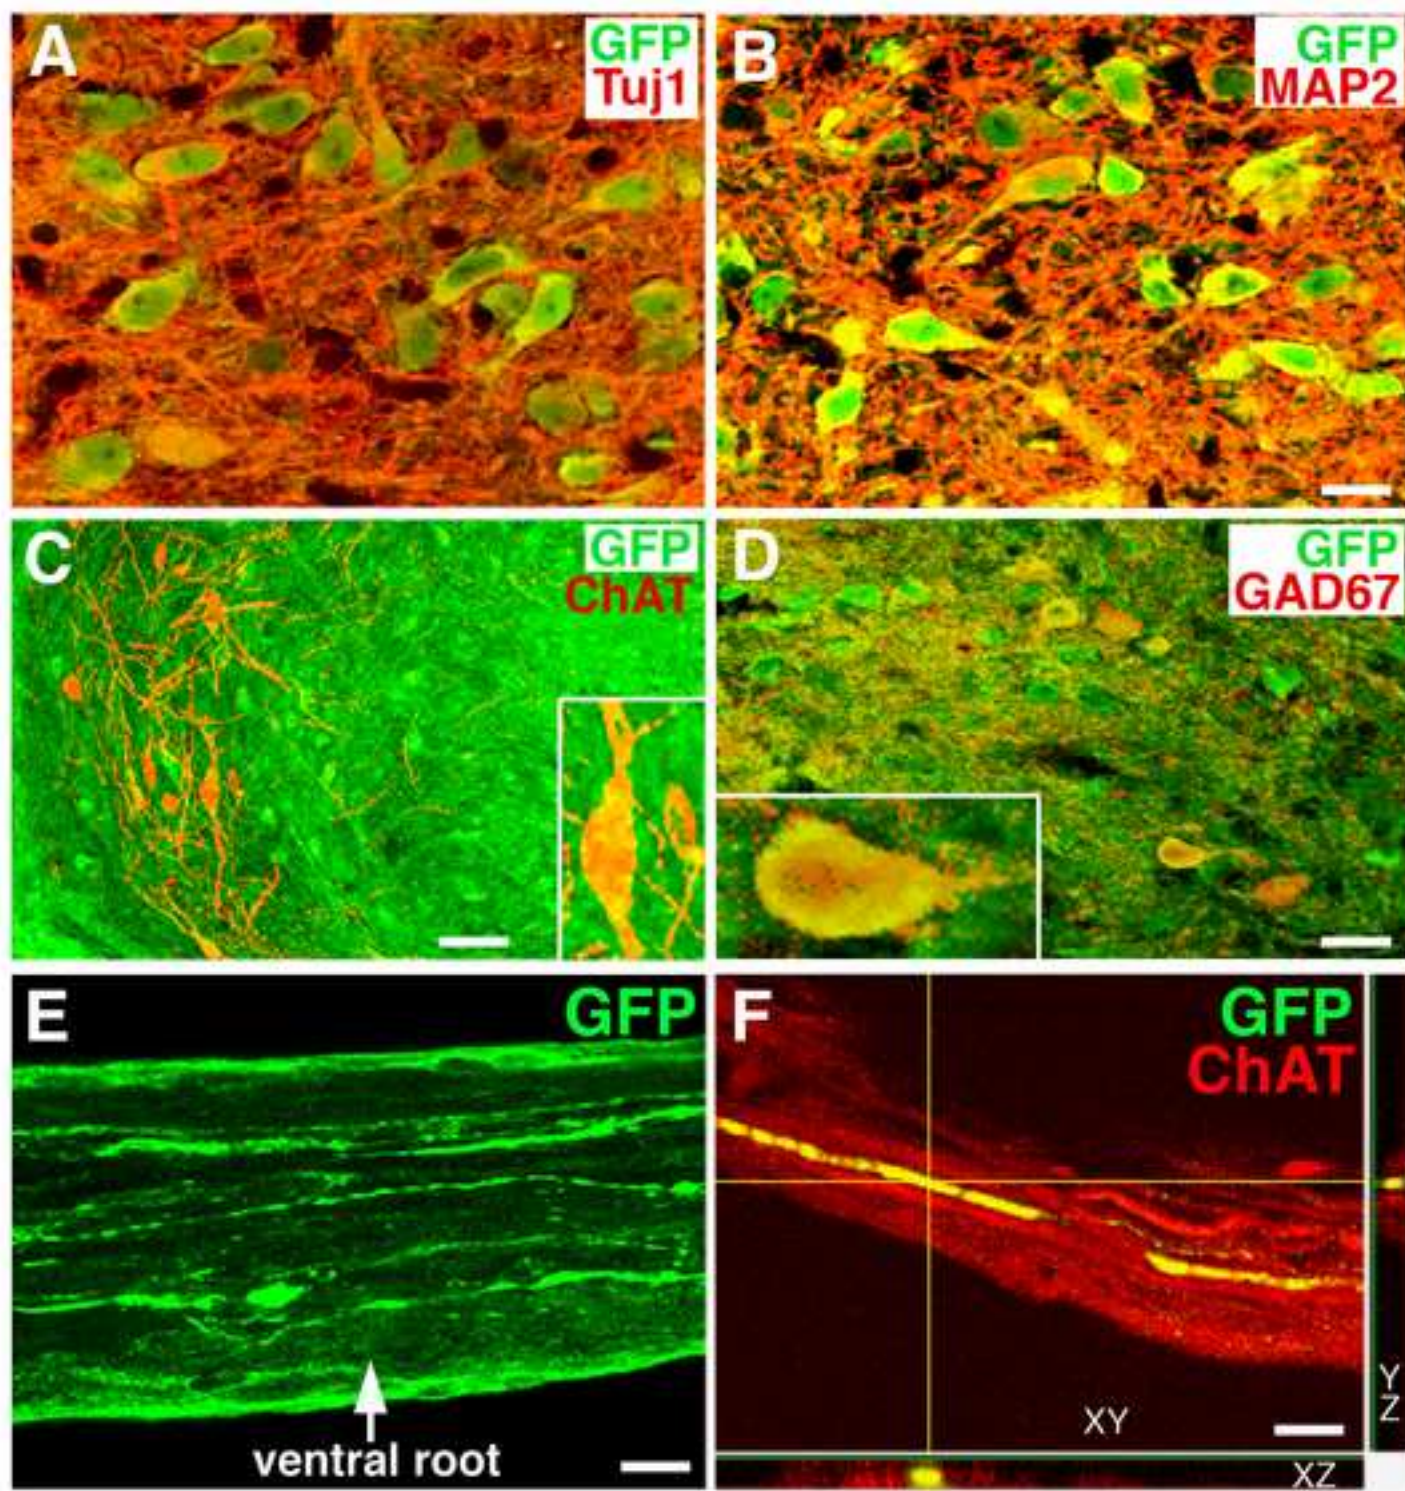

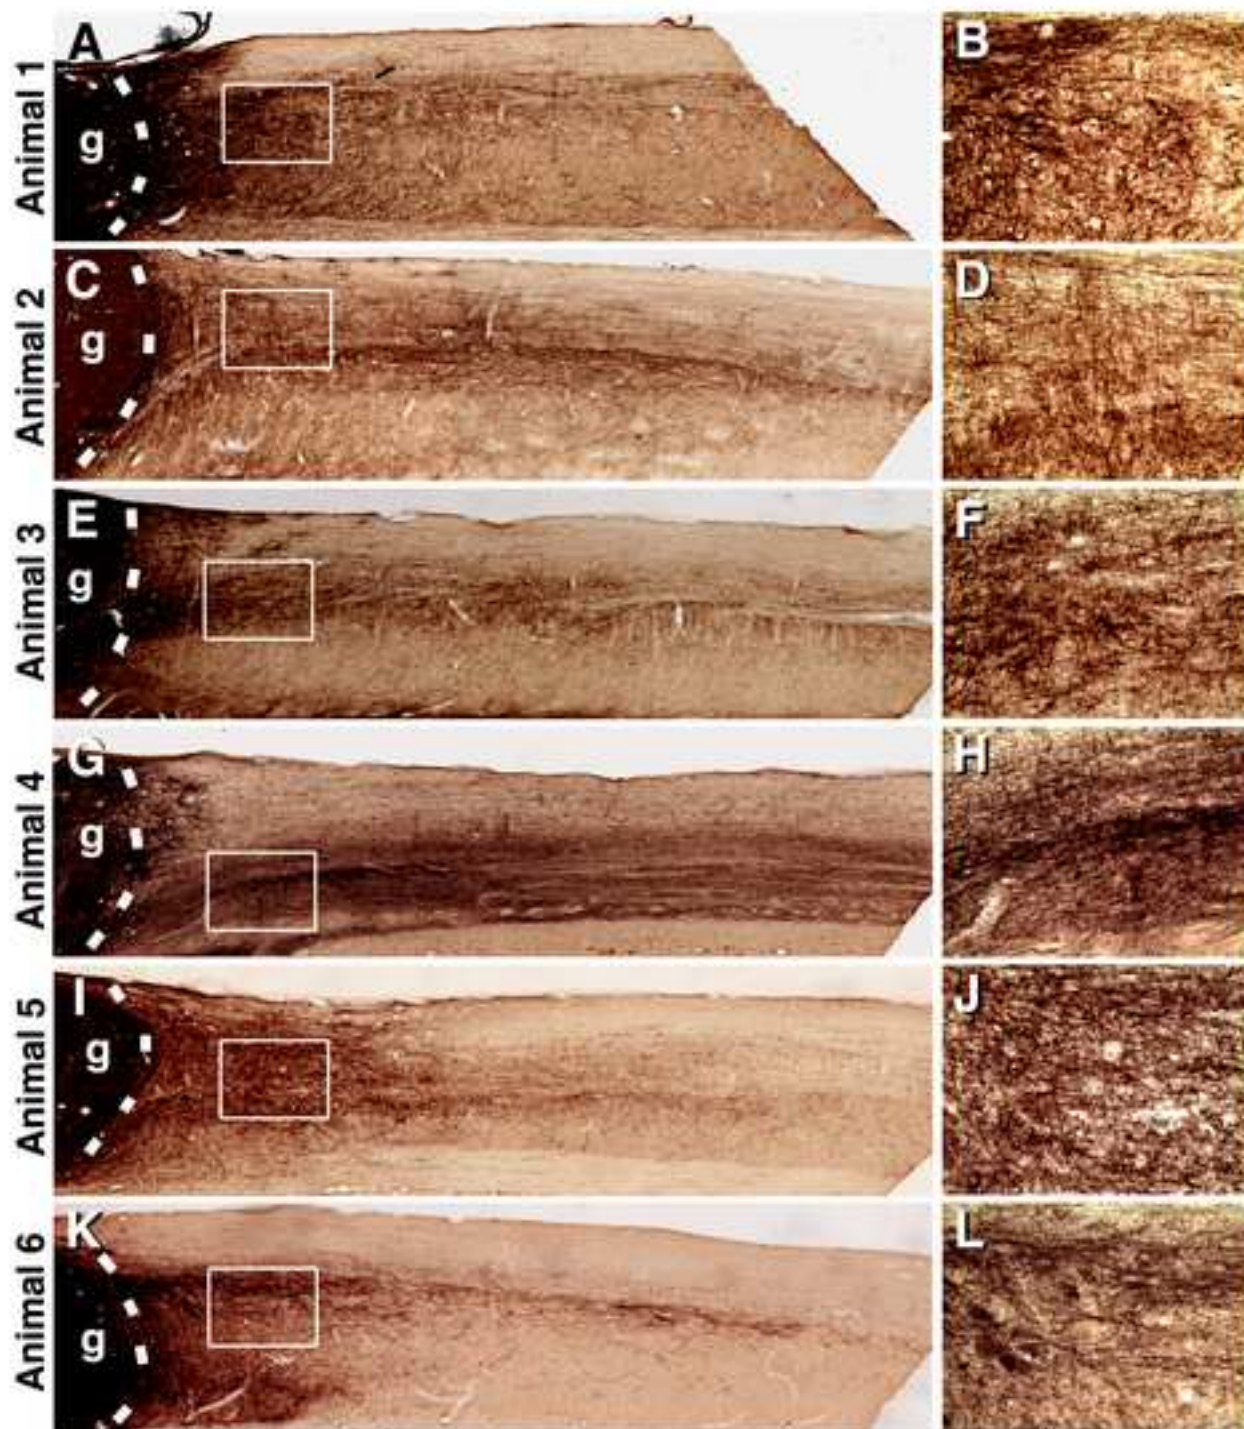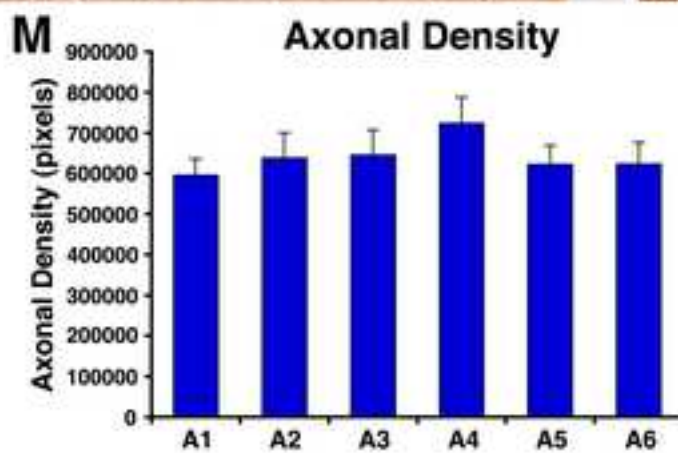

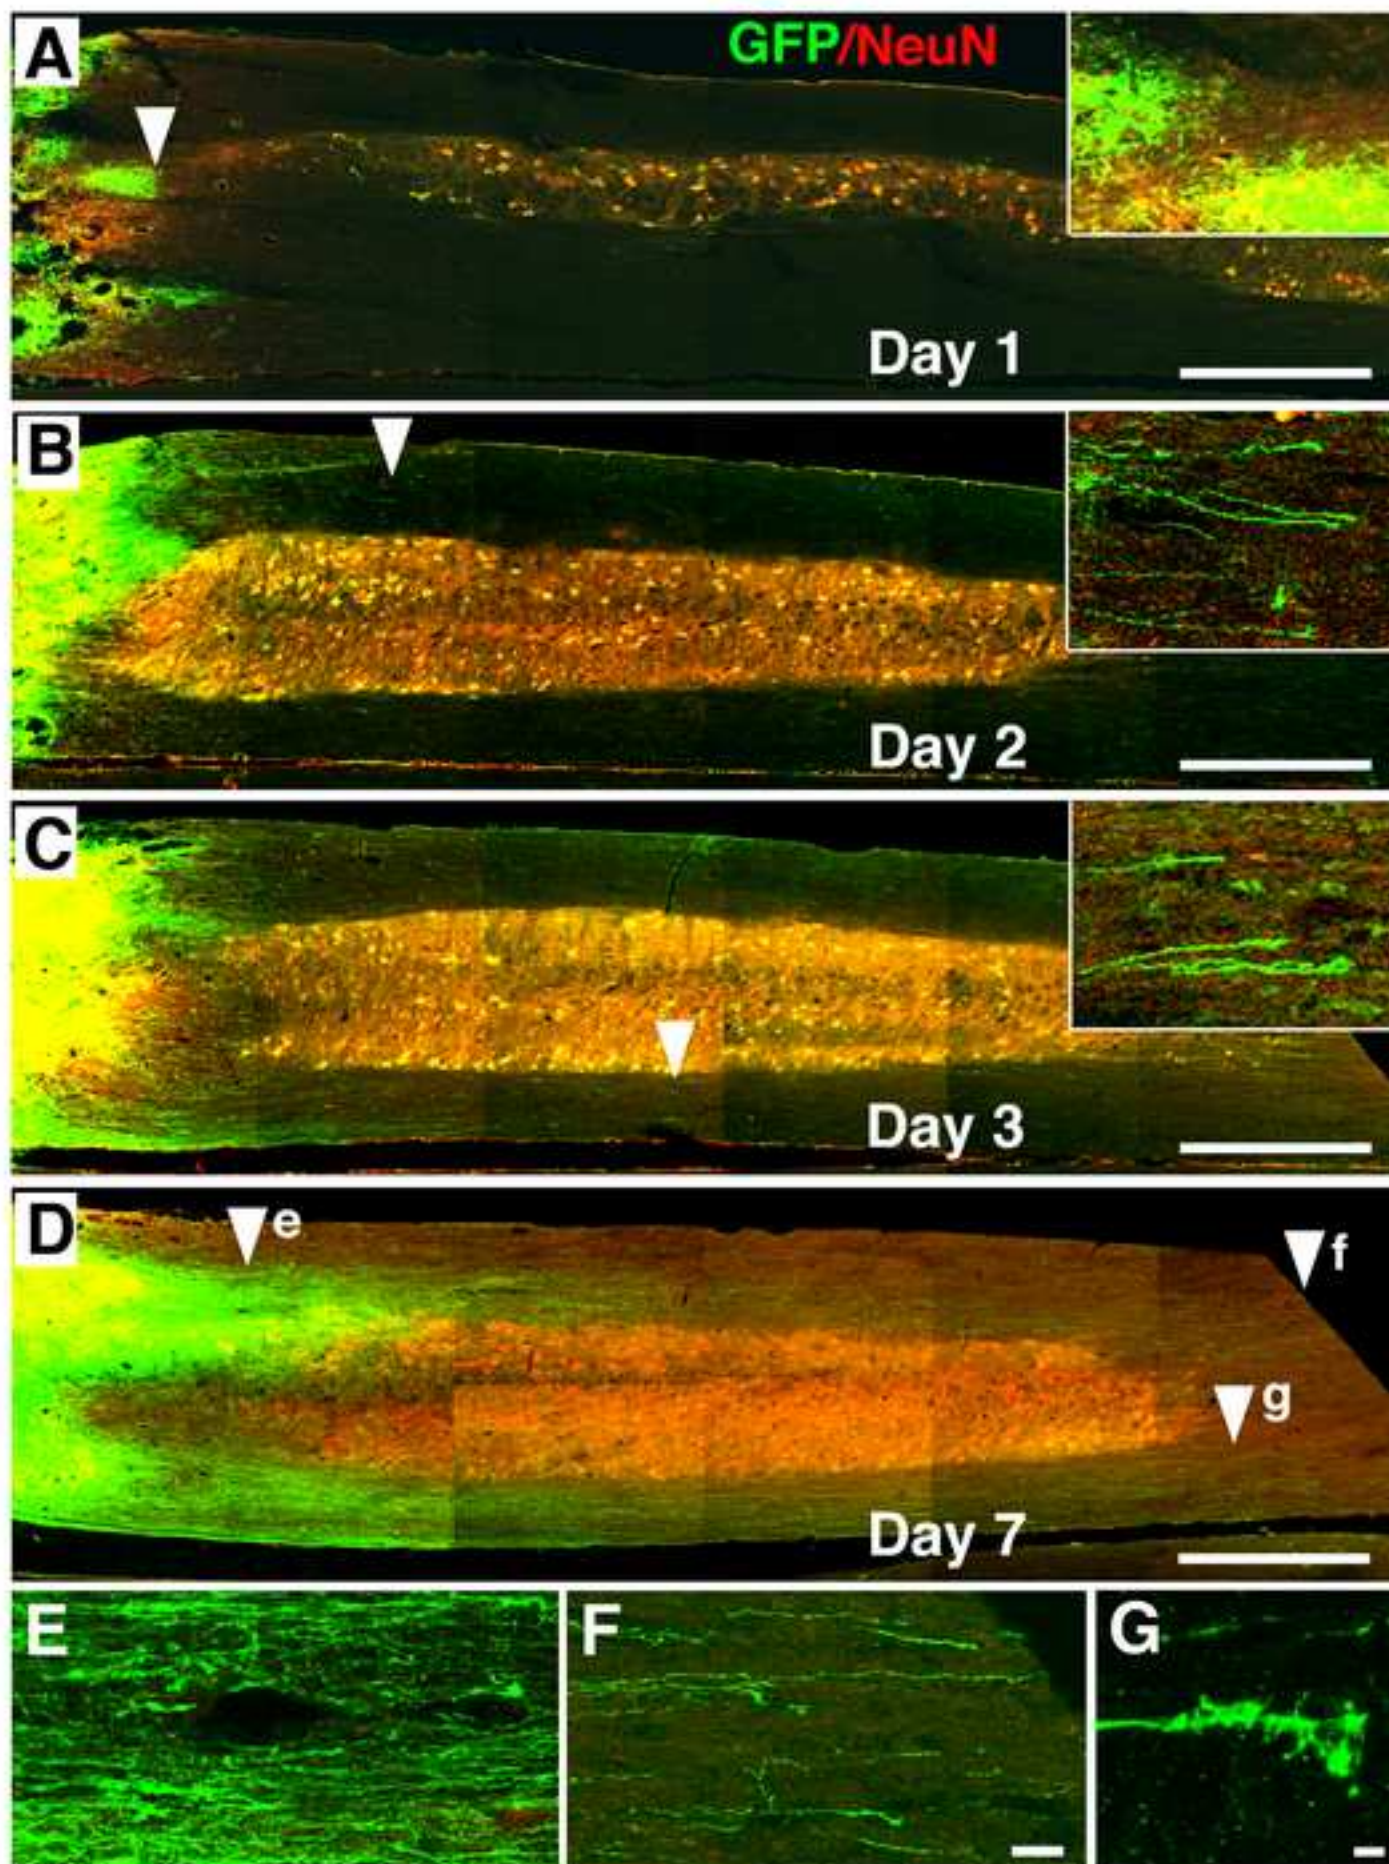

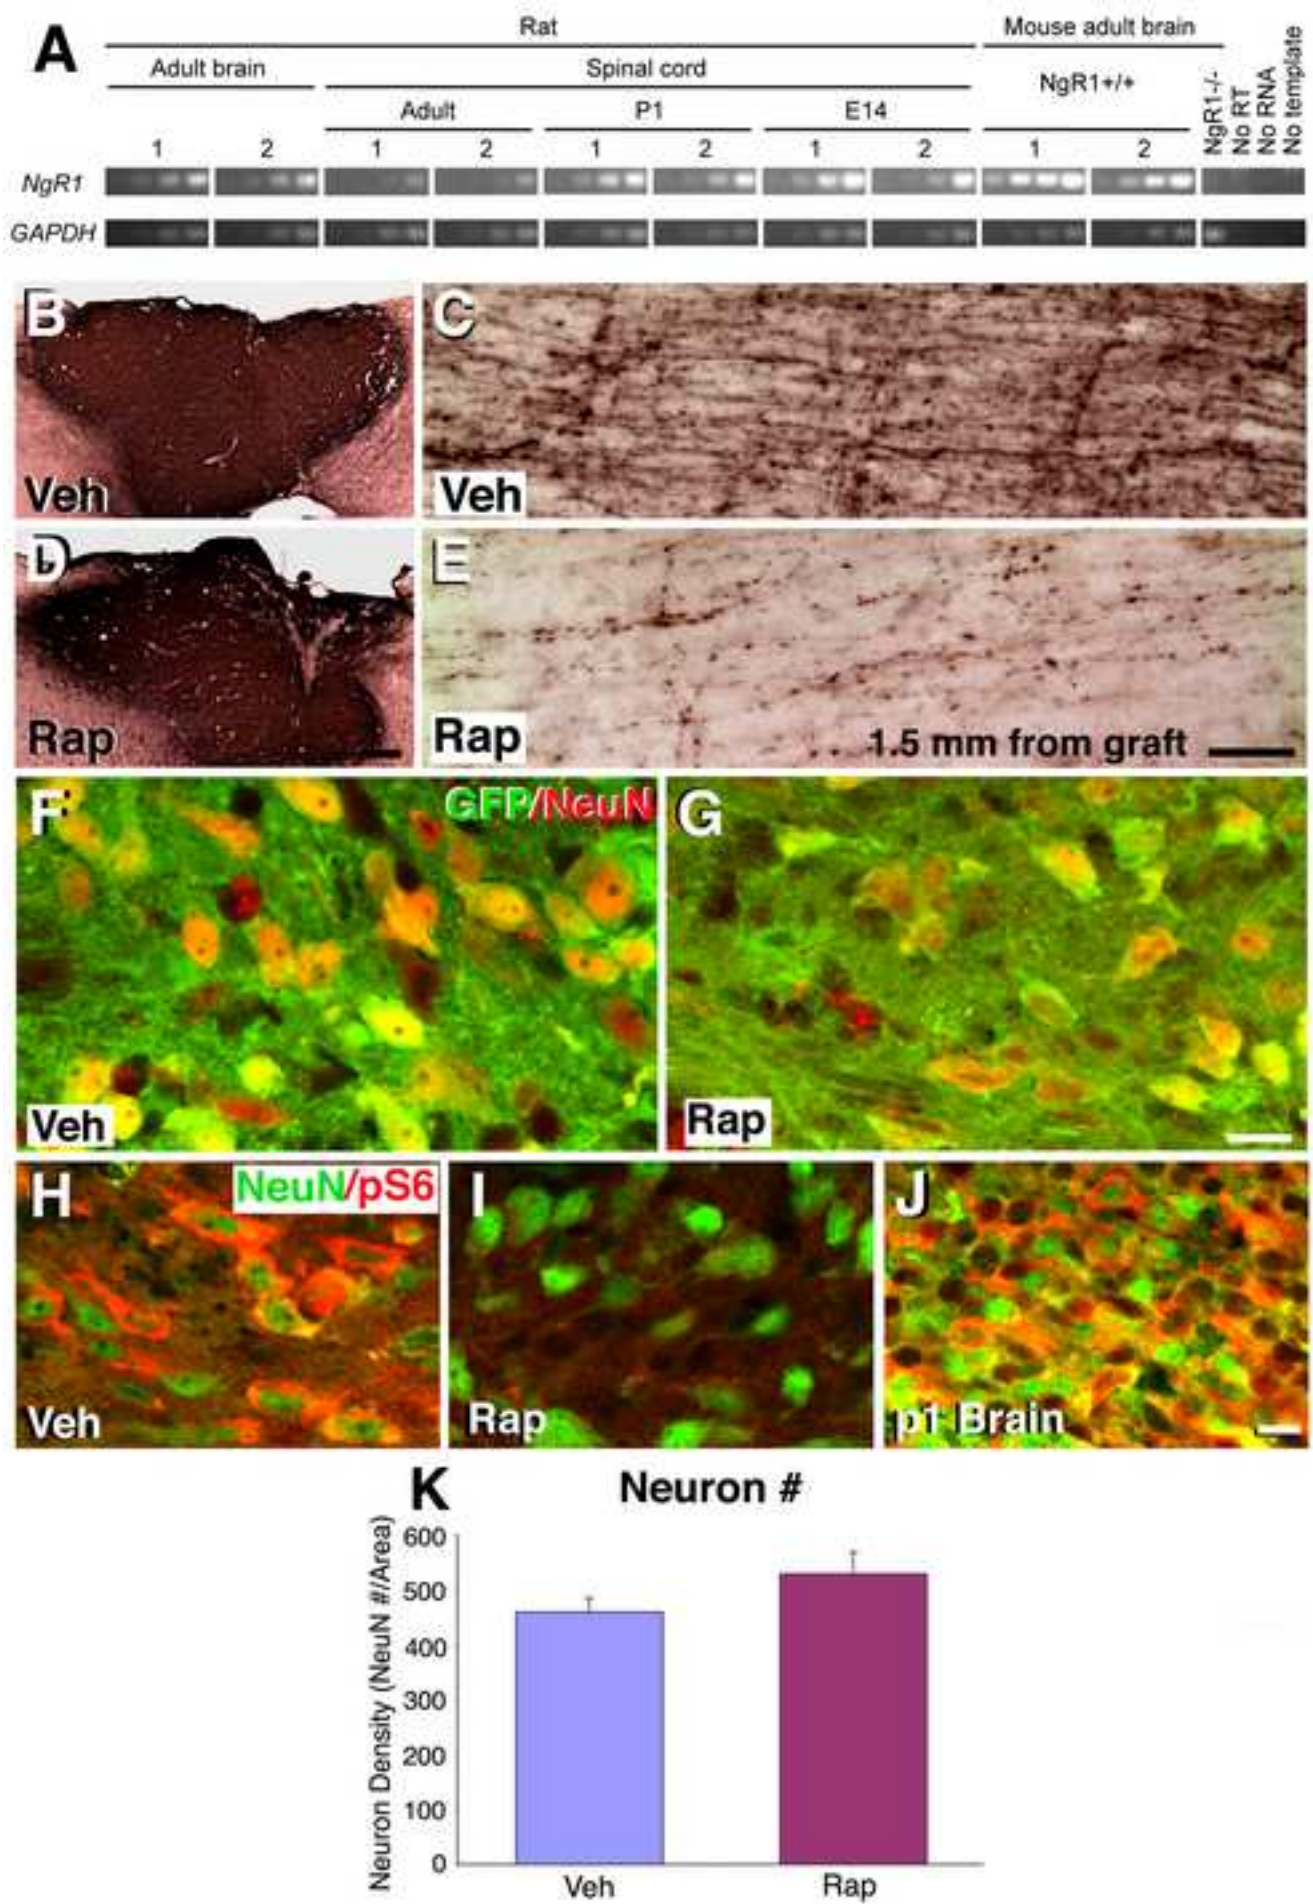

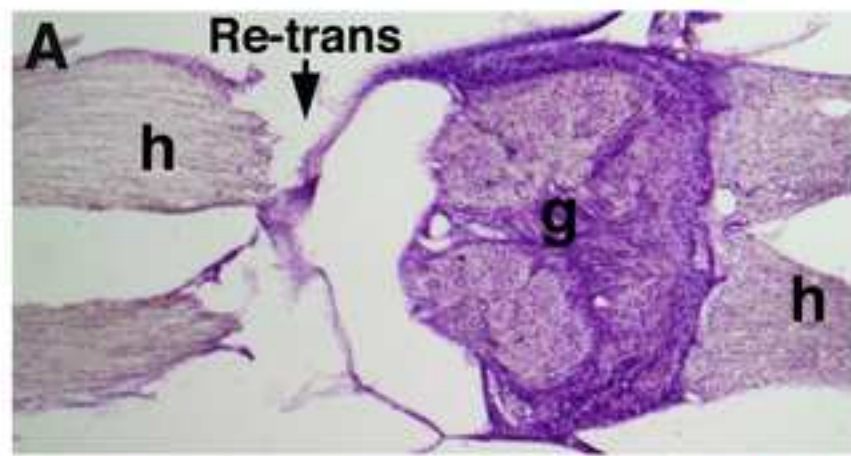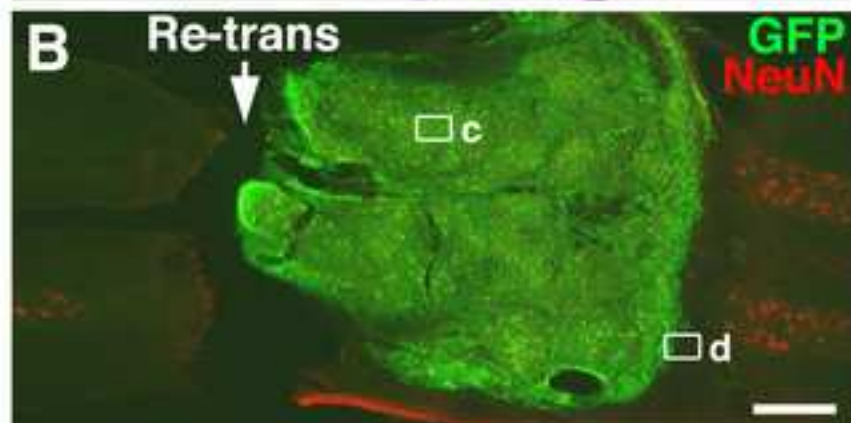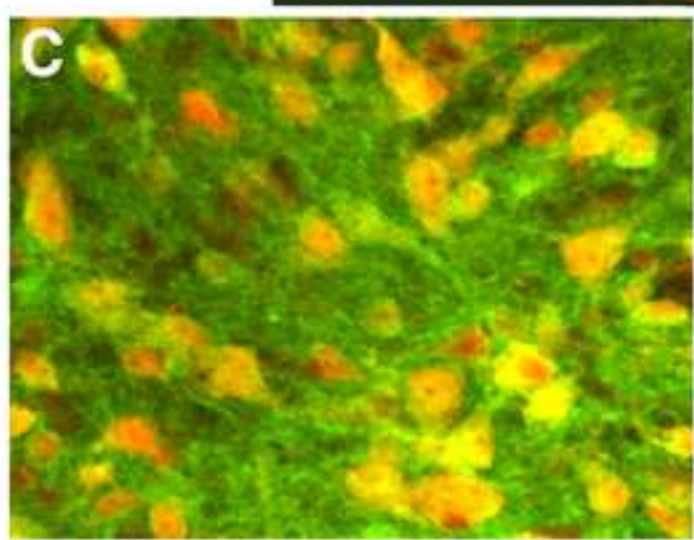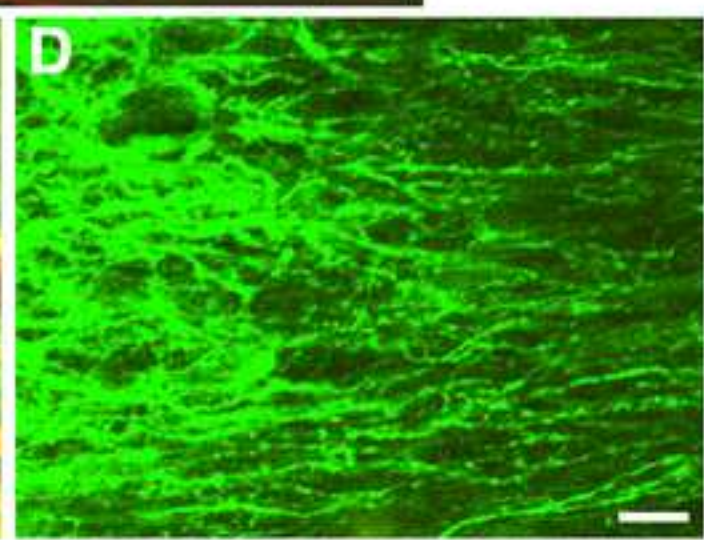

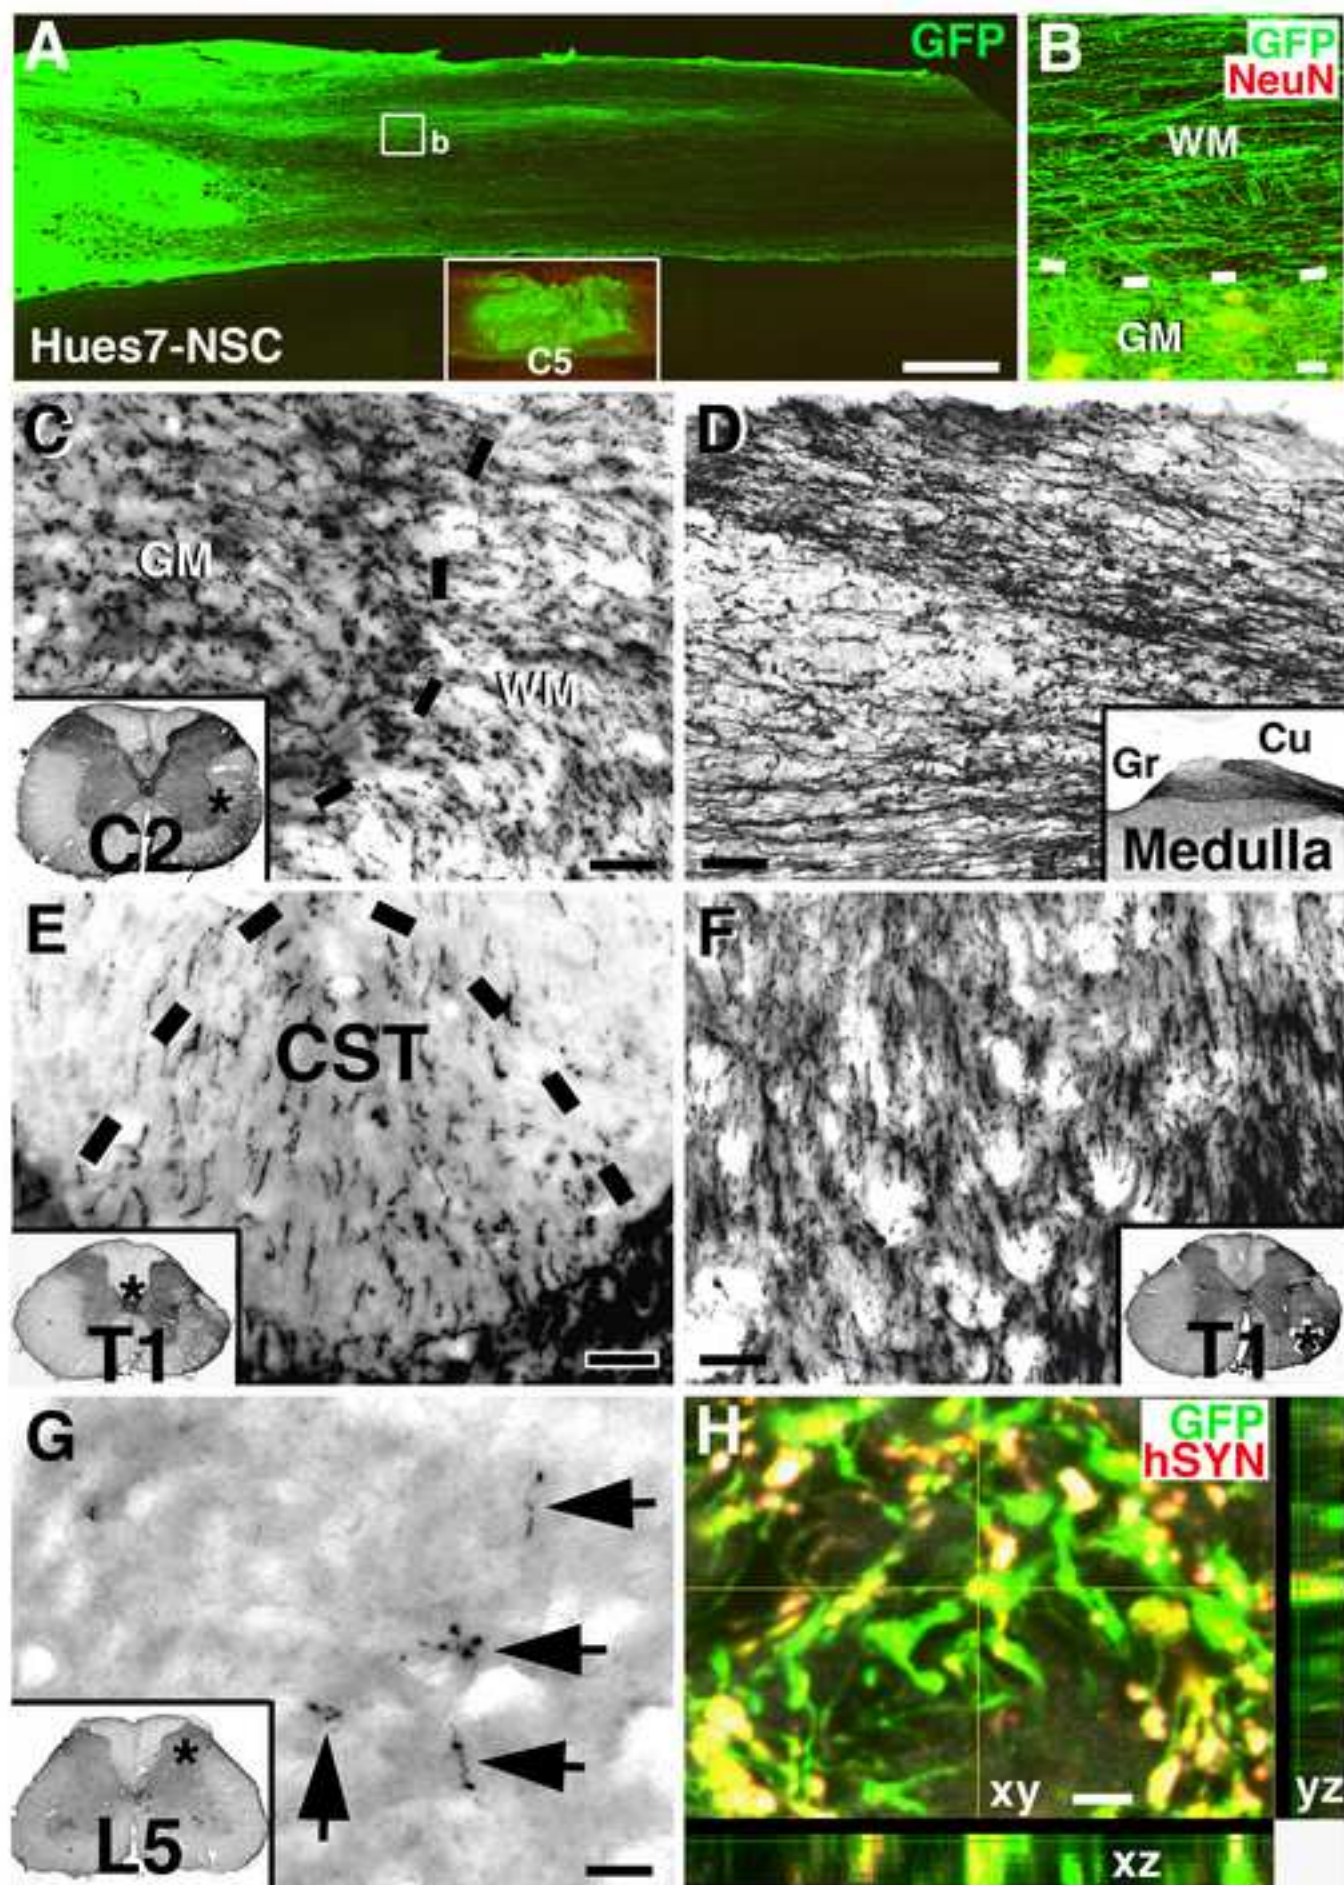

Supplement: NIHMS403163-supplement-02.pdf [file NIHMS403163-supplement-02.pdf]
